# Supplementary material
Source: Springer Nature journal article supplement (https://www.springermedizin.de/resource/supplementary/12955_2008_478_MOESM5_ESM.pdf/9560548)
Supplement: MOESM5 [file 9560548]

# Contextual Factors

(interact with and influence dimensions of disability)  
(exacerbate or alleviate episodes of disability)

## Extrinsic Contextual Factors

Social Support

Stigma

## Intrinsic Contextual Factors

Living  
Strategies

Personal Attributes  
(Aging)
